# Supplementary material
Source: PubMed Central journal article supplement (PMC4012601)
Supplement: supp_pp.113.233593_233593Supplemental_Figure_S4.pdf [file supp_pp.113.233593_233593Supplemental_Figure_S4.pdf]

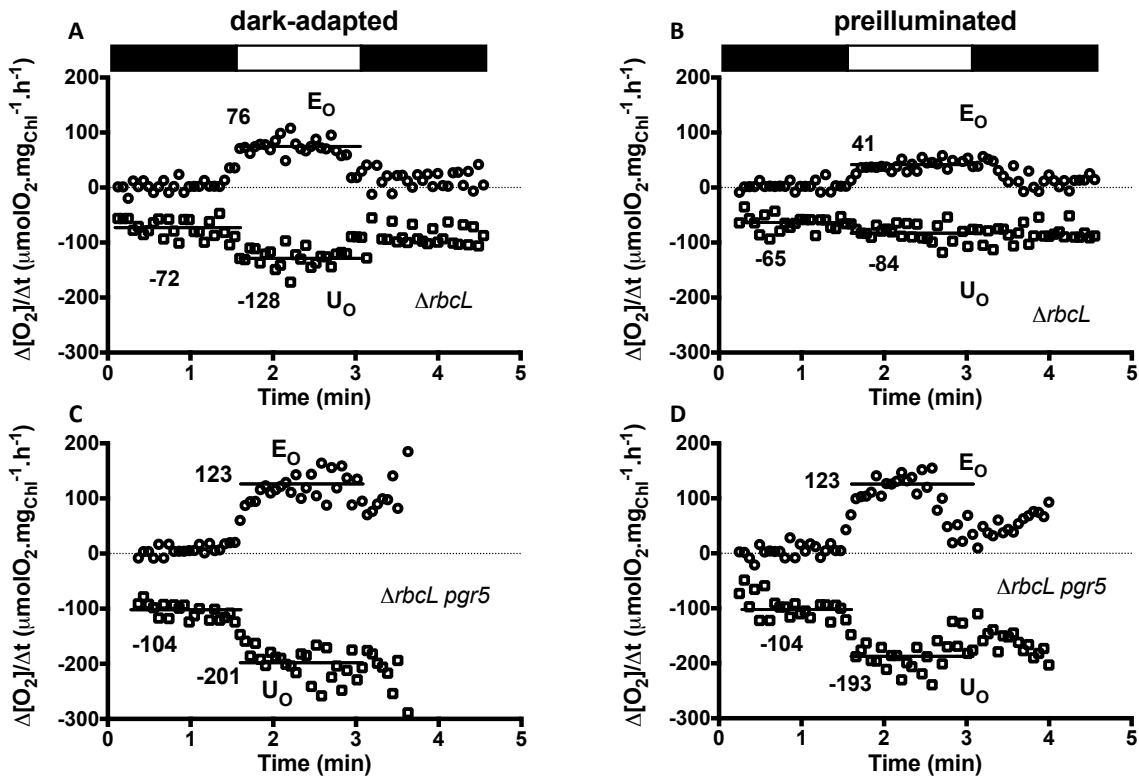

Supplemental Figure S4. MIMS (Cournac, Mus et al. 2002) raw data for  $O_2$  uptake ( $U_O$ ) and evolution ( $E_O$ ) rates in the dark and during a 1.5 minute illumination ( $700 \mu\text{mol}\cdot\text{m}^{-2}\cdot\text{s}^{-1}$ ) with cells concentrated to  $30 \mu\text{g}_{\text{Chl}}\cdot\text{ml}^{-1}$ . The bars show the average value in the dark or in the light.  $E_O = 0$  in the dark, while  $U_O$  is non null due to dark respiration. A large increase of  $U_O$  in the light (denoted  $\text{Li}U_O$  for light-induced uptake) is observed in some cases. The cells were either dark adapted before the measurement or preilluminated with  $120 \mu\text{E}\cdot\text{m}^{-2}\cdot\text{s}^{-1}$  of light with shaking for 5 minutes. Dark adapted  $\Delta rbcl$  (top panels A and B) differs in relation to  $\Delta rbcl pgr5$  (bottom panels C and D) because a pre-illumination had an inhibitory effect on both  $O_2$  evolution and light induced  $O_2$  uptake while the double mutant was unchanged.
